# Supplementary material
Source: Elsevier journal article supplement (https://www.sciencedirect.com/science/article/pii/S0870255120302675)
Supplement: mmc1 [file S0870255120302675:mmc1.doc]

# Supplementary data

| **Supplementary Table 1** Sequence of the 40 most dysregulated microRNAs in AS patients assessed by the microRNA array. | | | |
| --- | --- | --- | --- |
|  | Oligo name | Mature sequence | Oligo sequence |
| downregulated | hsa-let-7f-5p | UGAGGUAGUAGAUUGUAUAGUU | TGAGGTAGTAGATTGTATAGTT |
| hsa-miR-374a-5p | UUAUAAUACAACCUGAUAAGUG | TTATAATACAACCTGATAAGTG |
| hsa-miR-15a-5p | UAGCAGCACAUAAUGGUUUGUG | TAGCAGCACATAATGGTTTGTG |
| hsa-miR-199b-5p | CCCAGUGUUUAGACUAUCUGUUC | CCCAGTGTTTAGACTATCTGTTC |
| hsa-miR-3182 | GCUUCUGUAGUGUAGUC | GCTTCTGTAGTGTAGTC |
| hsa-miR-4286 | ACCCCACUCCUGGUACC | ACCCCACTCCTGGTACC |
| hsa-miR-1 | UGGAAUGUAAAGAAGUAUGUAU | TGGAATGTAAAGAAGTATGTAT |
| hsa-miR-4284 | GGGCUCACAUCACCCCAU | GGGCTCACATCACCCCAT |
| hsa-miR-374b-5p | AUAUAAUACAACCUGCUAAGUG | ATATAATACAACCTGCTAAGTG |
| hsa-miR-26a-5p | UUCAAGUAAUCCAGGAUAGGCU | TTCAAGTAATCCAGGATAGGCT |
| hsa-miR-130a-3p | CAGUGCAAUGUUAAAAGGGCAU | CAGTGCAATGTTAAAAGGGCAT |
| hsa-miR-26b-5p | UUCAAGUAAUUCAGGAUAGGU | TTCAAGTAATTCAGGATAGGT |
| hsa-miR-16-5p | UAGCAGCACGUAAAUAUUGGCG | TAGCAGCACGTAAATATTGGCG |
| hsa-miR-199a-3p | ACAGUAGUCUGCACAUUGGUUA | ACAGTAGTCTGCACATTGGTTA |
| hsa-miR-4328 | CCAGUUUUCCCAGGAUU | CCAGTTTTCCCAGGATT |
| hsa-miR-100-5p | AACCCGUAGAUCCGAACUUGUG | AACCCGTAGATCCGAACTTGTG |
| hsa-miR-199a-5p | CCCAGUGUUCAGACUACCUGUUC | CCCAGTGTTCAGACTACCTGTTC |
| hsa-miR-27a-3p | UUCACAGUGGCUAAGUUCCGC | TTCACAGTGGCTAAGTTCCGC |
| hsa-miR-21-5p | UAGCUUAUCAGACUGAUGUUGA | TAGCTTATCAGACTGATGTTGA |
| hsa-miR-126-5p | CAUUAUUACUUUUGGUACGCG | CATTATTACTTTTGGTACGCG |
| hsa-miR-195-5p | UAGCAGCACAGAAAUAUUGGC | TAGCAGCACAGAAATATTGGC |
| hsa-miR-27b-3p | UUCACAGUGGCUAAGUUCUGC | TTCACAGTGGCTAAGTTCTGC |
| hsa-miR-30b-5p | UGUAAACAUCCUACACUCAGCU | TGTAAACATCCTACACTCAGCT |
| hsa-miR-23b-3p | AUCACAUUGCCAGGGAUUACC | ATCACATTGCCAGGGATTACC |
| hsa-miR-126-3p | UCGUACCGUGAGUAAUAAUGCG | TCGTACCGTGAGTAATAATGCG |
| hsa-miR-143-3p | UGAGAUGAAGCACUGUAGCUC | TGAGATGAAGCACTGTAGCTC |
| hsa-miR-208b | AUAAGACGAACAAAAGGUUUGU | ATAAGACGAACAAAAGGTTTGT |
| hsa-miR-29b-3p | UAGCACCAUUUGAAAUCAGUGUU | TAGCACCATTTGAAATCAGTGTT |
| hsa-miR-29c-3p | UAGCACCAUUUGAAAUCGGUUA | TAGCACCATTTGAAATCGGTTA |
| hsa-miR-24-3p | UGGCUCAGUUCAGCAGGAACAG | TGGCTCAGTTCAGCAGGAACAG |
| hsa-miR-125b-5p | UCCCUGAGACCCUAACUUGUGA | TCCCTGAGACCCTAACTTGTGA |
| hsa-miR-99a-5p | AACCCGUAGAUCCGAUCUUGUG | AACCCGTAGATCCGATCTTGTG |
| hsa-miR-29a-3p | UAGCACCAUCUGAAAUCGGUUA | TAGCACCATCTGAAATCGGTTA |
| hsa-miR-101-3p | UACAGUACUGUGAUAACUGAA | TACAGTACTGTGATAACTGAA |
| hsa-miR-30e-5p | UGUAAACAUCCUUGACUGGAAG | TGTAAACATCCTTGACTGGAAG |
| upregulated | hsa-miR-1469 | CUCGGCGCGGGGCGCGGGCUCC | CTCGGCGCGGGGCGCGGGCTCC |
| hsa-miR-4268 | GGCUCCUCCUCUCAGGAUGUG | GGCTCCTCCTCTCAGGATGTG |
| hsa-miR-1587 | UUGGGCUGGGCUGGGUUGGG | TTGGGCTGGGCTGGGTTGGG |
| hsa-miR-744-5p | UGCGGGGCUAGGGCUAACAGCA | TGCGGGGCTAGGGCTAACAGCA |
| hsa-miR-4505 | AGGCUGGGCUGGGACGGA | AGGCTGGGCTGGGACGGA |

| **Supplementary Table 2** MicroRNAs studied that did not differ significantly between aortic stenosis patients and controls. | | |
| --- | --- | --- |
|  | AS | Controls |
| miR-4284 | 0.43±0.31 | 0.30±0.56 |
| miR-143-3p | 2.42±6.36 | 1.01±0.92 |
| miR-29b-3p | 0.73±2.28 | 0.45±0.66 |
| miR-16-5p | 0.19±0.20 | 0.29±0.27 |
| miR-26b-5p | 1.14±1.59 | 0.54±0.60 |
| miR-27a-3p | 1.71±2.10 | 0.96±0.96 |
| miR-199a-3p | 1.90±2.47 | 0.26±0.24 |
| miR-30b-5p | 1.23±2.46 | 0.13±0.13 |
| miR-23b-3p | 0.55±0.71 | 0.44±0.33 |
| miR-24-3p | 0.71±0.54 | 0.53±0.72 |
| miR-744-5p | 0.83±1.63 | 1.33±2.35 |
| miR-1469 | 0.25±0.47 | 0.26±0.27 |
| miR-27b-3p | 0.47±1.01 | 0.46±0.47 |
| miR-125b-5p | 0.20±0.22 | 0.21±0.18 |
| miR-21-5p | 1.10±2.50 | 0.13±0.14 |
| miR-4286 | 0.20±0.26 | 0.14±0.21 |
| miR-29c-3p | 0.23±0.53 | 0.11±0.15 |
| miR-30e-5p | 0.61±0.64 | 0.28±0.41 |
| let-7f-5p | 0.18±0.22 | 0.16±0.19 |
| miR-99a-5p | 0.12±0.18 | 0.08±0.10 |
| miR-199a-5p | 1.69±2.19 | 0.31±0.20 |
| miR-4505 | 0.62±1.14 | 0.63±0.68 |
| miR-1587 | 0.68±0.98 | 0.76±1.11 |
| miR-130a-3p | 0.16±0.34 | 0.11±0.07 |
| miR-29a-3p | 0.03±0.03 | 0.02±0.01 |
| miR-100-5p | 0.89±1.61 | 0.64±0.44 |
| miR-15a-5p | 0.32±0.25 | 0.25±0.25 |
| miR-208b | 0.42±0.75 | 0.16±0.14 |
| miR-26a-5p | 0.33±0.47 | 0.34±0.31 |
| miR-374b-5p | 0.62±0.56 | 0.35±0.27 |
| miR-4328 | 1.20±1.92 | 1.07±0.59 |
| p=NS in all cases. AS: aortic stenosis. | | |

| **Supplementary Table 3** Correlations between selected microRNAs not associated with aortic stenosis and echocardiographic variables and biomarkers. | | | | |
| --- | --- | --- | --- | --- |
|  | miR-125b-5p | | miR-4268 | |
| rs | p | rs | p |
| Echocardiographic variables |  |  |  |  |
| Baseline |  |  |  |  |
| RWTa | -0.151 | 0.658 | 0.420 | 0.198 |
| LVMIa | -0.600 | 0.051 | 0.718 | 0.013 |
| Zvab | -0.333 | 0.347 | 0.721 | 0.019 |
| 6 months |  |  |  |  |
| RWTa | -0.633 | 0.036 | 0.469 | 0.145 |
| LVMIa | -0.610 | 0.046 | 0.565 | 0.070 |
| ∆LVMa | -0.455 | 0.160 | 0.773 | 0.005 |
| Biomarkers |  |  |  |  |
| ANPc | -0.786 | 0.036 | 0.893 | 0.007 |
| BNPd | -0.767 | 0.016 | 0.283 | 0.460 |
| Ang II receptore | -0.600 | 0.208 | 0.943 | 0.005 |
| ACEd | -0.600 | 0.208 | 0.771 | 0.072 |
| CTGFd | -0.486 | 0.329 | 0.600 | 0.208 |
| a n=11.  b n=10.  c n=7.  d n=9.  d n=6.  Spearman’s rank correlation was used. Significant correlations are in bold.  ∆LVM: left ventricular mass variation; ACE: angiotensin-converting enzyme; Ang II: angiotensin II; ANP: atrial natriuretic peptide; BNP: brain natriuretic peptide; CTGF: connective tissue growth factor; LVMI: left ventricular mass index; RWT: relative wall thickness; Zva: valvuloarterial impedance. | | | | |
